# Supplementary material for: Dynamical Expression of MicroRNA-127-3p in Proliferating and Differentiating C2C12 Cells
Source: PubMed Central journal article supplement — Asian-Australas J Anim Sci. 2016 Jan 29;29(12):1790–5. doi: 10.5713/ajas.15.0968 (PMC5088429; doi:10.5713/ajas.15.0968), 2016-01-29

Supplement file

Table .S1 Primer sequences for reverse transcription and RT-PCR in this study.

| Gene   | Primer sequence (5'-3')                             | Size (bp) | Annealing temperature (°C) |
|--------|-----------------------------------------------------|-----------|----------------------------|
| MyoD   | F:GGCTCTCTCTGCTCCTTTGA<br>R:GTAGGGAAGTGTGCGTGCTC    | 149       | 60                         |
| MyoG   | F:GCAGGCTCAAGAAAGTGAATG<br>R:AGGCGCTCAATGTACTGGAT   | 121       | 60                         |
| Myf5   | F:AAGGCTCCTGTATCCCCTCAC<br>R:TGACCTTCTTCAGGCGTCTAC  | 249       | 59                         |
| Mef2c  | F:ATCCCGATGCAGACGATTTCAG<br>R:AACAGCACACAATCTTTGCCT | 110       | 60                         |
| Myosin | F:AGGCACCTGCTGAAGAAGAC<br>R:CCTCGAAGGTCTGTGACTCC    | 100       | 60                         |
| GAPDH  | F:TCAAGAAGGTGGTGAAGCAG<br>R:AGGTGGAAGAGTGGGAGTTG    | 111       | 60                         |

Fig. S2 Different morphology changes of C2C12 cells during proliferation and differentiation.

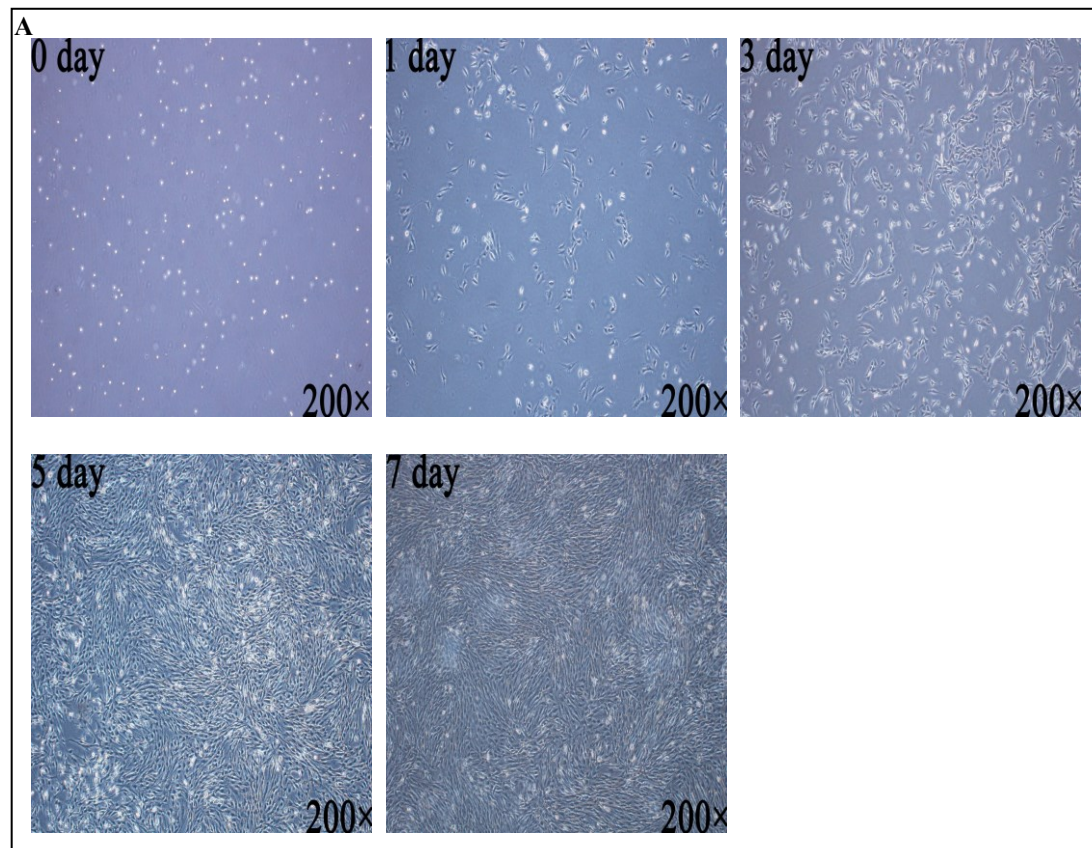

**B**

0 day

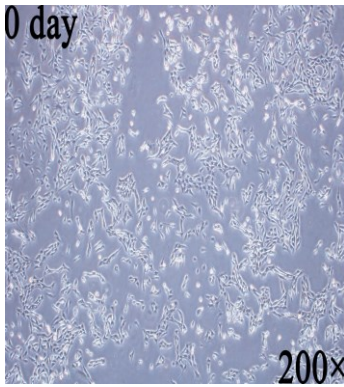

1 day

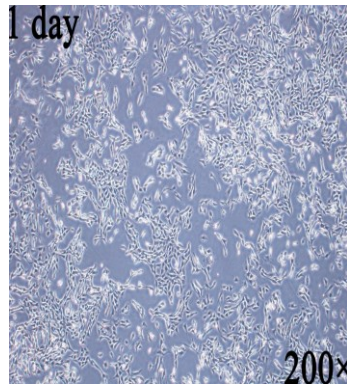

3 day

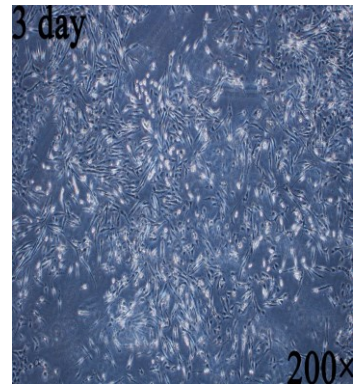

5 day

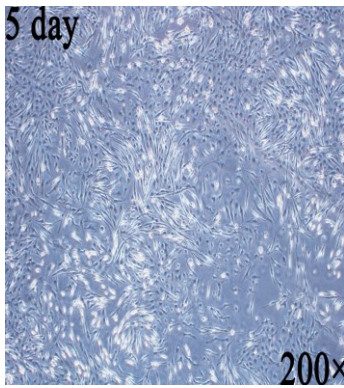

7 day

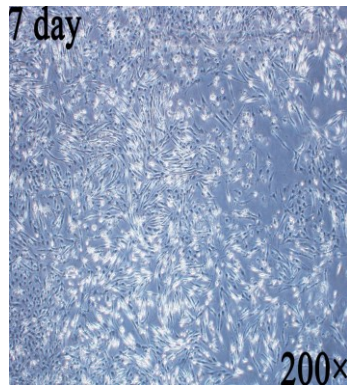

Supplement: ajas-29-12-1790-supplementary.pdf [file ajas-29-12-1790-supplementary.pdf]
